# Supplementary material
Source: Springer Nature journal article supplement (https://www.springermedizin.de/resource/supplementary/12990_2007_93_MOESM6_ESM.pdf/9612552)

## Morphine

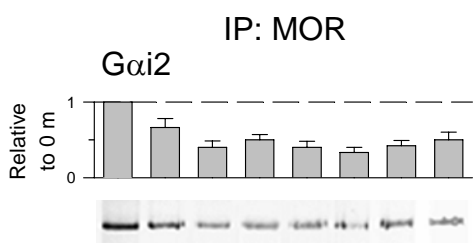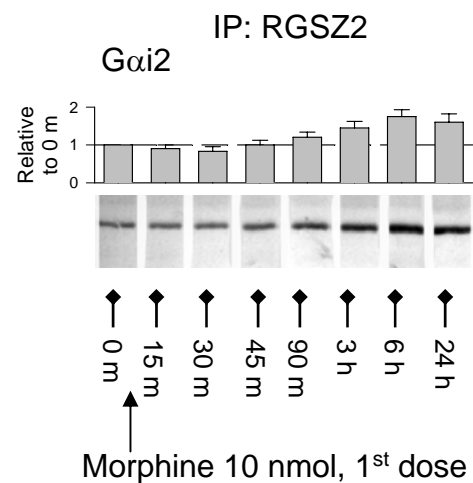

## DAMGO

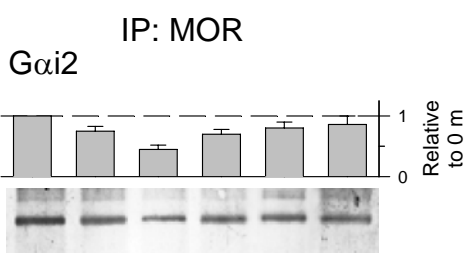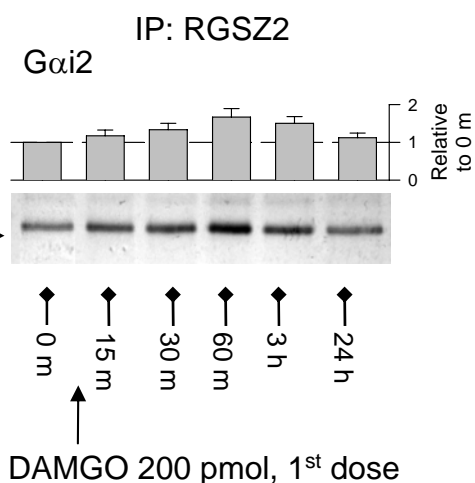

## IP: MOR

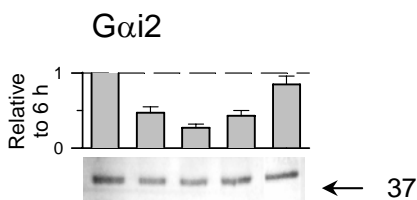

## IP: RGSZ2

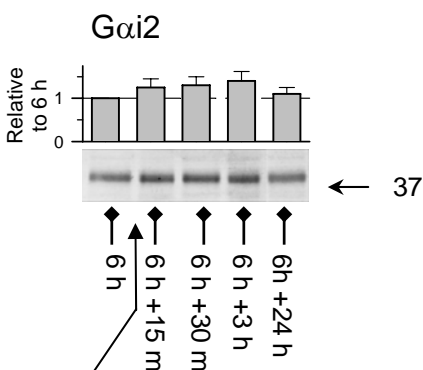

Morphine 10 nmol, 2<sup>nd</sup> dose

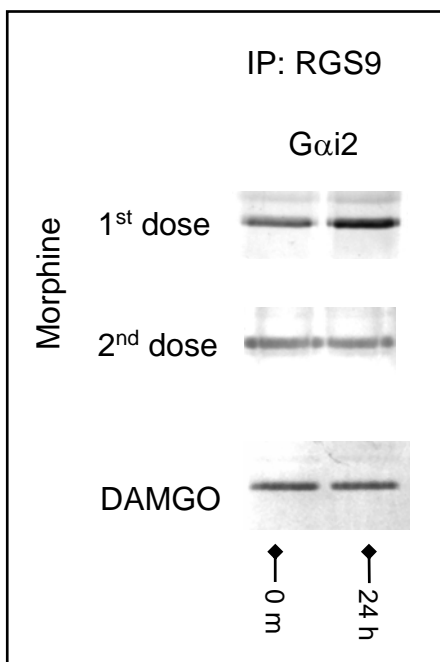

Supplement: MOESM6 [file 9612552]
